# Supplementary material for: Direct evidence that density-dependent regulation underpins the temporal stability of abundant species in a diverse animal community
Source: PubMed Central journal article supplement (PMC4132688; doi:10.1098/rspb.2014.1336), 2014-09-22
Supplement: rspb20141336supp1.pdf [file rspb20141336supp1.pdf]

|    | Species                                                     | Total number recorded 1981-2012 | Guild           | Years present | Core species | Density Dependence detected | Non-linearity /threshold in log pop. - Log pop change plot | log pop. /Log pop. change gradient > 1   | Bulmers R                                     | Bulmers R*          | Notes on detailed analysis                                                                                                                                                                   |
|----|-------------------------------------------------------------|---------------------------------|-----------------|---------------|--------------|-----------------------------|------------------------------------------------------------|------------------------------------------|-----------------------------------------------|---------------------|----------------------------------------------------------------------------------------------------------------------------------------------------------------------------------------------|
| 1  | <i>Sprattus sprattus</i> (L.) - Sprat                       | 46734                           | Pelagic         | 31            | Yes          | Yes                         | No                                                         | No                                       | Sig. 5% level                                 | No                  | Recruitment declines with increasing adult abundance giving strong evidence for density-dependence. Stock-recruitment relationship fits a Ricker curve.                                      |
| 2  | <i>Merlangius merlangus</i> (L.) - Whiting                  | 43241                           | Proximo-benthic | 31            | Yes          | Yes                         | Yes                                                        | Yes - when abundance above threshold     | Sig. 5% level                                 | Sig. 10% level      |                                                                                                                                                                                              |
| 3  | <i>Pomatoschistus minutus</i> (Pallas) - sand goby          | 9579                            | soft benthic    | 31            | Yes          | Yes                         | No                                                         | No                                       | Sig. 5% level                                 | Sig. 5% level       |                                                                                                                                                                                              |
| 4  | <i>Solea solea</i> L. - Dover sole                          | 7235                            | soft benthic    | 31            | Yes          | Yes                         | No                                                         | No                                       | Sig. 5% level                                 | No                  | Mortality increases with recruitment - population number has followed a sigmoidal curve and is now varying around carrying capacity                                                          |
| 5  | <i>Trisopterus minutus</i> (L.) - poor cod                  | 6296                            | Proximo-benthic | 30            | Yes          | Yes                         |                                                            |                                          | Sig. 5% level                                 | Sig. 5% level       |                                                                                                                                                                                              |
| 6  | <i>Trisopterus luscus</i> (L.) - pout                       | 3970                            | Proximo-benthic | 31            | Yes          | Yes                         | No                                                         | No                                       | Sig. 5% level                                 | Sig. 5% level       | Pout abundance notably stable with no trend                                                                                                                                                  |
| 7  | <i>Liparis liparis</i> (L.) - sea snail                     | 2865                            | soft benthic    | 31            | Yes          | Yes                         | No                                                         | No                                       | Sig. 5% level                                 | Sig. 5% level       | Published work Henderson, P. A. & Seaby, R. M. H. (1999) shows a high proportion of temporal variability linked to temperature mediated migrations. Underlying population remarkably stable. |
| 8  | <i>Platichthys flesus</i> (L.) - flounder                   | 2862                            | soft benthic    | 31            | Yes          | Yes                         | Yes                                                        | Yes - when abundance above threshold     | Sig. 5% level                                 | No                  |                                                                                                                                                                                              |
| 9  | <i>Clupea harengus</i> L. - herring                         | 2688                            | Pelagic         | 29            | Yes          | Yes                         | No                                                         | No                                       | Sig. 5% level                                 | No                  | Population recovering with an almost stepped increase in abundance post 2000                                                                                                                 |
| 10 | <i>Dicentrarchus labrax</i> (L.) - bass                     | 2599                            | Proximo-benthic | 31            | Yes          | Yes                         | No                                                         | No                                       | Yes                                           | No                  | Published work Henderson and Corp showing that high recruitment suppresses subsequent recruitment for next 2 years.                                                                          |
| 11 | <i>Giliota mustela</i> (L.) - 5-bearded rockling            | 2061                            | soft benthic    | 31            | Yes          | Yes                         | No                                                         | No                                       | Sig. 5% level                                 | No                  | Recently the exponential increase has stabilised and now the over-winter loss of biomass is greatest in high biomass years giving good evidence for density-dependence.                      |
| 12 | <i>Gadus morhua</i> L. - cod                                | 1781                            | Proximo-benthic | 30            | Yes          | Yes                         | No                                                         | Yes but -1.095 so unconvincing           | Sig. 5% sig level for both number and biomass | Sig. 5% for biomass | Biomass notably stable with no long-term trend                                                                                                                                               |
| 13 | <i>Limanda limanda</i> (L.) - dab                           | 1579                            | soft benthic    | 31            | Yes          | Yes                         | Yes                                                        | Yes when data is split pre and post 1994 | Sig. 5% level                                 | No                  | Abundance is temperature dependent which is why the data set shows discontinuity                                                                                                             |
| 14 | <i>Liza ramada</i> (Risso) - thin-lipped mullet             | 1516                            | sheltered       | 31            | Yes          | Yes                         | No                                                         | No                                       | Sig. 5% level                                 | Sig. 5% level       | Biomass notably stable with no long-term trend                                                                                                                                               |
| 15 | <i>Entelurus aequoreus</i> (L.) - snake pipefish            | 739                             | Pelagic         | 29            | Yes          | Yes                         | No                                                         | No                                       | No                                            | No                  | There was a single large burst in abundance centred on 2008                                                                                                                                  |
| 16 | <i>Euriglyptus gurnardus</i> (L.) - grey gurnard            | 518                             | soft benthic    | 27            | Yes          | No                          | No                                                         | No                                       | Sig. 5% level                                 | Sig. 5% level       | There was a single large burst in abundance centred on 2007                                                                                                                                  |
| 17 | <i>Allosa fallax</i> (Lacepede) - twaite shad               | 516                             | passage         | 28            | Yes          | not included                |                                                            |                                          |                                               |                     | Passage migrant                                                                                                                                                                              |
| 18 | <i>Aphia minuta</i> (Risso) - transparent goby              | 445                             | Pelagic         | 31            | Yes          | Yes                         | No                                                         | Yes post 1989 when numbers increased     | Sig. 5% level                                 | No                  |                                                                                                                                                                                              |
| 19 | <i>Anguilla anguilla</i> (L.) - eel                         | 315                             | passage         | 30            | Yes          | not included                | No                                                         | no                                       | No                                            | No                  | Exponential decline reported Henderson et al (2012) - anthropogenic impact                                                                                                                   |
| 20 | <i>Conger conger</i> L. - conger eel                        | 289                             | hard benthic    | 31            | Yes          | Yes                         | No                                                         | No                                       | Sig. 5% level                                 | Yes 10% sig level   |                                                                                                                                                                                              |
| 21 | <i>Trisopterus esmarkii</i> - norway pout                   | 240                             | Proximo-benthic | 28            | Yes          | Yes                         | No                                                         | No                                       | Sig. 5% level                                 | No                  |                                                                                                                                                                                              |
| 22 | <i>Merluccius merluccius</i> (L.) - hake                    | 197                             | Proximo-benthic | 17            | No           | No                          |                                                            |                                          | zero abundances                               |                     | Species disappeared in 1999 probably linked to climate change.                                                                                                                               |
| 23 | <i>Agonus cataphractus</i> (L.)                             | 191                             | hard benthic    | 31            | Yes          | Yes                         | No                                                         | No                                       | Sig. 5% level                                 | Sig. 5% level       | Hooke's abundance has changed little over 30 years                                                                                                                                           |
| 24 | <i>Pleuronectes platessa</i> L.                             | 179                             | soft benthic    | 28            | Yes          | Yes                         | No                                                         | Yes                                      | Sig. 5% level                                 | No                  |                                                                                                                                                                                              |
| 25 | <i>Pollachius pollachius</i> (L.)                           | 113                             | Proximo-benthic | 27            | Yes          | Yes                         | No                                                         | Yes                                      | Sig. 5% level                                 | No                  |                                                                                                                                                                                              |
| 26 | <i>Mullus surmuletus</i> L.                                 | 111                             | soft benthic    | 17            | No           | No                          | No                                                         | No                                       | Frequent zero abundances                      |                     | Warm water migrant                                                                                                                                                                           |
| 27 | <i>Cyclopterus lumpus</i> L. - lump sucker                  | 109                             | hard benthic    | 18            | No           | No                          | No                                                         | No                                       | Frequent zero abundances                      |                     | Cold water species almost absent since 2000                                                                                                                                                  |
| 29 | <i>Giliota septentrionalis</i> (Collet)                     | 87                              | soft benthic    | 28            | Yes          | Yes                         | No                                                         | No                                       | Sig. 5% level                                 | No                  | Data from 1999-2011 used for Buller's test. Occurs in small numbers during winter                                                                                                            |
| 30 | <i>Callionymus lyra</i> L. - dragonette                     | 86                              | hard benthic    | 26            | Yes          | No                          | No                                                         | No                                       | Frequent zero abundances                      |                     | Too uncommon for analysis, but numbers are notably constant through time.                                                                                                                    |
| 31 | <i>Raja clavata</i> L. - thornback ray                      | 76                              | soft benthic    | 26            | Yes          | No                          | No                                                         | No                                       | Frequent zero abundances                      |                     | Too uncommon for analysis, but numbers are notably constant through time.                                                                                                                    |
| 32 | <i>Micromesistius poutassou</i> - blue whiting              | 67                              | Proximo-benthic | 9             | No           | No                          |                                                            |                                          |                                               |                     | Rare transient - fits random model                                                                                                                                                           |
| 33 | <i>Syngnathus rostellatus</i> Nilsson                       | 66                              | sheltered       | 25            | Yes          | No                          | No                                                         | No                                       | Frequent zero abundances                      |                     | Low numbers recorded, but abundance notably constant                                                                                                                                         |
| 34 | <i>Maurulius muelleri</i> (Gmelin) - pearlides              | 56                              | Pelagic         | 17            | No           | No                          | No                                                         | No                                       |                                               |                     | Deep water transient - fits random model                                                                                                                                                     |
| 35 | <i>Pomatoschistus microps</i> (Kroyer) - common goby        | 53                              | soft benthic    | 9             | No           | No                          |                                                            |                                          | zero abundances                               |                     | Occasional visitor - prefers upper estuarine waters - fits random model                                                                                                                      |
| 36 | <i>Scyllorhynchus canaliculus</i> (L.) - dogfish            | 53                              | soft benthic    | 23            | Yes          | Yes                         | No                                                         | No                                       | Sig. 5% level                                 |                     | Numbers are remarkably constant, but small. Analysis undertaken on time series from 1999                                                                                                     |
| 37 | <i>Gasterosteus aculeatus</i> L. 3-spined stickleback       | 52                              | freshwater      | 22            | No           | No                          | No                                                         | No                                       | Zero abundances                               |                     | Freshwater species which washes out of rivers in winter                                                                                                                                      |
| 38 | <i>Syngnathus acus</i> (L.) - greater pipefish              | 44                              | sheltered       | 13            | No           | No                          | No                                                         | No                                       | Zero abundances                               |                     | Fits random model                                                                                                                                                                            |
| 39 | <i>Chelidonichthys lucerna</i> L. - tub gurnard             | 39                              | soft benthic    | 15            | No           | No                          | No                                                         | No                                       | Zero abundances                               |                     | Fits random model                                                                                                                                                                            |
| 40 | <i>Atherina boyeri</i> Risso - sandmelt                     | 27                              | sheltered       | 14            | No           | No                          | No                                                         | No                                       | Zero abundances                               |                     | Lives in lagoons - fits random model                                                                                                                                                         |
| 41 | <i>Gobius niger</i> L. - black goby                         | 27                              | soft benthic    | 11            | No           | No                          | No                                                         | No                                       | Zero abundances                               |                     | Fits random model                                                                                                                                                                            |
| 42 | <i>Pagrus major</i> (L.) - turbot                           | 27                              | soft benthic    | 11            | No           | No                          | No                                                         | No                                       | Zero abundances                               |                     | Fits random model                                                                                                                                                                            |
| 43 | <i>Liza aurata</i> - golden grey mullet                     | 24                              | sheltered       | 4             | No           | Rare visitor                | No                                                         | No                                       | Zero abundances                               |                     | Too rare to fit any model                                                                                                                                                                    |
| 44 | <i>Ammodytes tobianus</i> L. - greater sandeel              | 22                              | soft benthic    | 15            | No           | No                          | No                                                         | No                                       | Zero abundances                               |                     | Prefers clean sand - fits random model                                                                                                                                                       |
| 45 | <i>Lophius piscatorius</i> L. - angler fish                 | 19                              | soft benthic    | 7             | No           | Rare visitor                |                                                            |                                          |                                               |                     | Deeper water species - fits random model                                                                                                                                                     |
| 46 | <i>Scophthalmus rhombus</i> (L.) - brill                    | 19                              | soft benthic    | 9             | No           | Rare visitor                |                                                            |                                          |                                               |                     | Fits random model                                                                                                                                                                            |
| 47 | <i>Trachurus trachurus</i> (L.) - horse mackerel            | 16                              | Pelagic         | 13            | No           | No                          | No                                                         | No                                       | Zero abundances                               |                     | Fits random model                                                                                                                                                                            |
| 48 | <i>Labrus bergyllus</i> Ascanius - bellin wrasse            | 15                              | hard benthic    | 6             | No           | Rare visitor                |                                                            |                                          |                                               |                     | Fits random model                                                                                                                                                                            |
| 49 | <i>Gadropsanus vulgaris</i> (Cloquet) - 3bearded rockling   | 10                              | soft benthic    | 5             | No           | Rare visitor                |                                                            |                                          |                                               |                     | Fits random model                                                                                                                                                                            |
| 50 | <i>Crenimugil labrosus</i> (Risso) - thick-lipped mullet    | 9                               | sheltered       | 4             | No           | Rare visitor                |                                                            |                                          |                                               |                     | Fits random model                                                                                                                                                                            |
| 51 | <i>Lampetra fluviatilis</i> (L.) - river lamprey            | 9                               | passage         | 8             | No           | not included                |                                                            |                                          |                                               |                     | Passage migrant                                                                                                                                                                              |
| 52 | <i>Selmo selmo</i> L. - salmon                              | 9                               | passage         | 8             | No           | not included                |                                                            |                                          |                                               |                     | Passage migrant                                                                                                                                                                              |
| 53 | <i>Crystalllogobius linearis</i> (von Duben) - crystal goby | 8                               | Pelagic         | 4             | No           | Rare visitor                |                                                            |                                          |                                               |                     | Fits random model                                                                                                                                                                            |
| 54 | <i>Hyperoplus lanceolatus</i> (Lesauvage) - greater sandeel | 8                               | soft benthic    | 6             | No           | Rare visitor                |                                                            |                                          |                                               |                     | Fits random model                                                                                                                                                                            |
| 55 | <i>Spinachia spinachia</i> (L.) - 15-spined stickleback     | 7                               | hard benthic    | 6             | No           | Rare visitor                |                                                            |                                          |                                               |                     | Fits random model                                                                                                                                                                            |
| 56 | <i>Spondylosoma ophiurus</i> (L.) - black sea bream         | 7                               | hard benthic    | 7             | No           | Rare visitor                |                                                            |                                          |                                               |                     | Fits random model                                                                                                                                                                            |
| 57 | <i>Parablennius gottorpinge</i> L. - tompot blenny          | 6                               | hard benthic    | 6             | No           | Rare visitor                |                                                            |                                          |                                               |                     | Fits random model                                                                                                                                                                            |
| 58 | <i>Ctenolabrus rupestris</i> (L.) - goldsinny               | 6                               | hard benthic    | 5             | No           | Rare visitor                |                                                            |                                          |                                               |                     | Fits random model                                                                                                                                                                            |
| 59 | <i>Engraulis encrasicolus</i> (L.) - anchovy                | 6                               | Pelagic         | 3             | No           | Rare visitor                |                                                            |                                          |                                               |                     | Fits random model                                                                                                                                                                            |
| 60 | <i>Gobius pagonellus</i> - rock goby                        | 5                               | soft benthic    | 2             | No           | Rare visitor                |                                                            |                                          |                                               |                     | Too rare to fit any model                                                                                                                                                                    |
| 61 | <i>Sardina pilchardus</i> (Walbaum) - pilchard              | 5                               | Pelagic         | 2             | No           | Rare visitor                |                                                            |                                          |                                               |                     | Too rare to fit any model                                                                                                                                                                    |
| 62 | <i>Raniceps raninus</i> (L.) - tadpole fish                 | 4                               | soft benthic    | 4             | No           | Rare visitor                |                                                            |                                          |                                               |                     | Too rare to fit any model                                                                                                                                                                    |
| 63 | <i>Regilissidium leucom</i> (Risso) - solenette             | 3                               | soft benthic    | 2             | No           | Rare visitor                |                                                            |                                          |                                               |                     | Too rare to fit any model                                                                                                                                                                    |
| 64 | <i>Centrolabrus exoletus</i> (L.) - goldsinny               | 3                               | hard benthic    | 2             | No           | Rare visitor                |                                                            |                                          |                                               |                     | Too rare to fit any model                                                                                                                                                                    |
| 65 | <i>Labrus mixtus</i> - cuckoo wrasse                        | 3                               | hard benthic    | 3             | No           | Rare visitor                |                                                            |                                          |                                               |                     | Too rare to fit any model                                                                                                                                                                    |
| 66 | <i>Micrometopus kitz-lemon sole</i>                         | 3                               | soft benthic    | 3             | No           | Rare visitor                |                                                            |                                          |                                               |                     | Too rare to fit any model                                                                                                                                                                    |
| 67 | <i>Molva molva</i> (L.) - ling                              | 3                               | soft benthic    | 3             | No           | Rare visitor                |                                                            |                                          |                                               |                     | Too rare to fit any model                                                                                                                                                                    |
| 68 | <i>Trigla lyra</i> - piper                                  | 3                               | soft benthic    | 2             | No           | Rare visitor                |                                                            |                                          |                                               |                     | Too rare to fit any model                                                                                                                                                                    |
| 69 | <i>Ballistes carolinensis</i> (Gmelin) - trigger fish       | 2                               | hard benthic    | 2             | No           | Rare visitor                |                                                            |                                          |                                               |                     | Too rare to fit any model                                                                                                                                                                    |
| 70 | <i>Ctenilabrus melops</i> (L.) - corkwing wrasse            | 2                               | hard benthic    | 2             | No           | Rare visitor                |                                                            |                                          |                                               |                     | Too rare to fit any model                                                                                                                                                                    |
| 71 | <i>Petromyzon marinus</i> - sea lamprey                     | 2                               | passage         | 2             | No           | not included                |                                                            |                                          |                                               |                     | Passage migrant                                                                                                                                                                              |
| 72 | <i>Raja brachyura</i> - blond ray                           | 2                               | soft benthic    | 2             | No           | Rare visitor                |                                                            |                                          |                                               |                     | Too rare to fit any model                                                                                                                                                                    |
| 73 | <i>Raja microcellata</i> - small eyed ray                   | 2                               | soft benthic    | 2             | No           | Rare visitor                |                                                            |                                          |                                               |                     | Too rare to fit any model                                                                                                                                                                    |
| 74 | <i>Zoarces viverrus</i> L. - john dory                      | 2                               | Pelagic         | 2             | No           | Rare visitor                |                                                            |                                          |                                               |                     | Too rare to fit any model                                                                                                                                                                    |
| 75 | <i>Belone belone</i> (L.) - garfish                         | 1                               | Pelagic         | 1             | No           | Rare visitor                |                                                            |                                          |                                               |                     | Too rare to fit any model                                                                                                                                                                    |
| 76 | <i>Glyptocephalus cynoglossus</i> - witch                   | 1                               | soft benthic    | 1             | No           | Rare visitor                |                                                            |                                          |                                               |                     | Too rare to fit any model                                                                                                                                                                    |
| 77 | <i>Nereophilus lumbriciformis</i> - worm pipefish           | 1                               | sheltered       | 1             | No           | Rare visitor                |                                                            |                                          |                                               |                     | Too rare to fit any model                                                                                                                                                                    |
| 78 | <i>Pollachius virens</i> (L.) - saith                       | 1                               | Proximo-benthic | 1             | No           | Rare visitor                |                                                            |                                          |                                               |                     | Too rare to fit any model                                                                                                                                                                    |
| 79 | <i>Trachinus vipera</i> Cuvier - weaver                     | 1                               | soft benthic    | 2             | No           | Rare visitor                |                                                            |                                          |                                               |                     | Too rare to fit any model                                                                                                                                                                    |
| 80 | <i>Zenopsis punctatus</i> (Bloch) - topknot                 | 1                               | hard benthic    | 1             | No           | Rare visitor                |                                                            |                                          |                                               |                     | Too rare to fit any model                                                                                                                                                                    |
| 81 | <i>Ammodytes marinus</i> - sandeel                          | 1                               | soft benthic    | 1             | No           | Rare visitor                |                                                            |                                          |                                               |                     | Too rare to fit any model                                                                                                                                                                    |
